# Supplementary material for: A high photoluminescence sensor for selective detection of cartap based on functionalized VBimBF4B ionic liquid-strengthened sulfur-doped carbon nanodots
Source: Royal Society of Chemistry journal article supplement (doi:10.1039/c9nj00728h), 2019-01-01
Supplement: c9nj00728h1.pdf [file c9nj00728h1.pdf]

**High photoluminescence sensor for selective detection of cartap  
by functionalized VBimBF<sub>4</sub>B ionic liquid-strengthened sulfur-  
doped carbon nanodots**

**Ying Zhang<sup>a</sup>, Dianwei Zhang<sup>a</sup>, Jingmin Liu<sup>b</sup>, Shuo Wang<sup>a,b</sup>, Huilin Liu<sup>a\*</sup>**

**<sup>a</sup> Beijing Advanced Innovation Center for Food Nutrition and Human Health,  
Beijing Engineering and Technology Research Center of Food Additives, Beijing  
Technology and Business University, 11 Fucheng Road, Beijing, 100048, China.**

**<sup>b</sup> Tianjin Key Laboratory of Food Science and Health, School of Medicine,  
Nankai University, Tianjin, 300071, China.**

**\*Corresponding author: Huilin Liu**

**Tel: (86 10) 68984545;**

**Fax: (86 10) 68985456;**

**Email: liuhuilin@btbu.edu.cn**

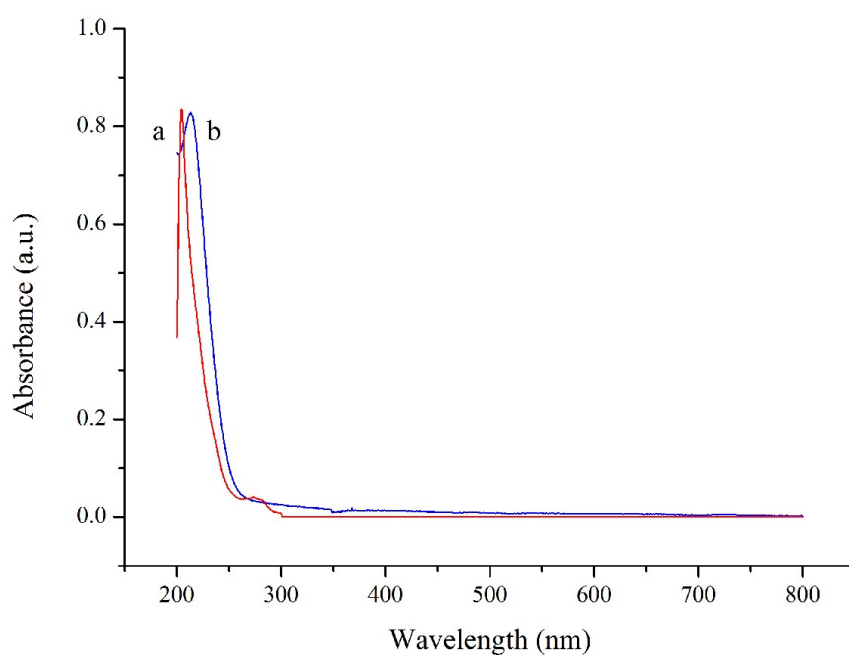

Fi

g. S1 The ultraviolet absorption spectra of CP (a) and S-Cdots (b).

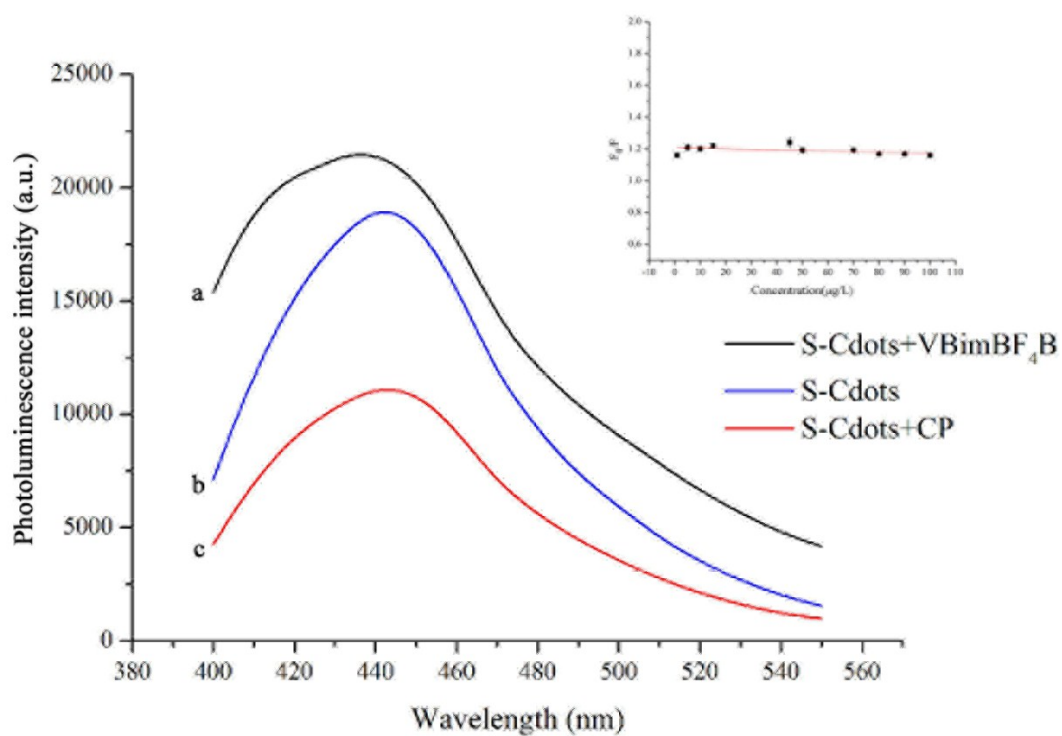

Fig. S2 FL spectra of the control polymer (a), VBimBF<sub>4</sub>B-strengthened S-Cdots (b),  
VBimBF<sub>4</sub>B-strengthened S-Cdots after adding CP (c).

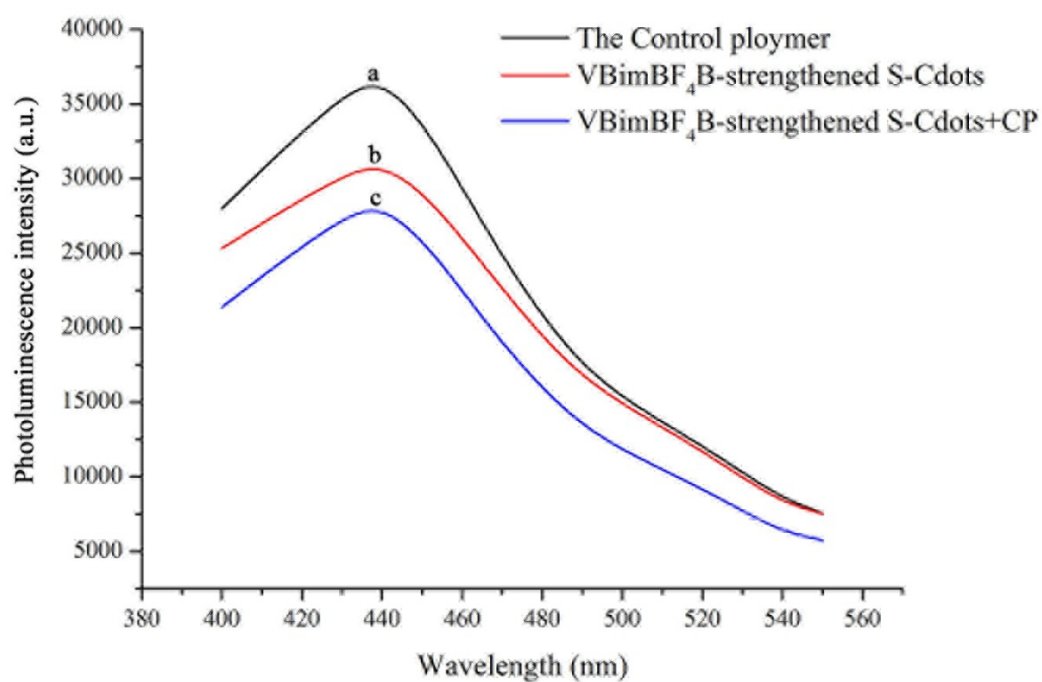

Fig. S3 FL spectra of the S-Cdots before (b) and after the addition of VBimBF<sub>4</sub>B (a) and CP (c). The inset presents the calibration plots for CP on S-Cdots.

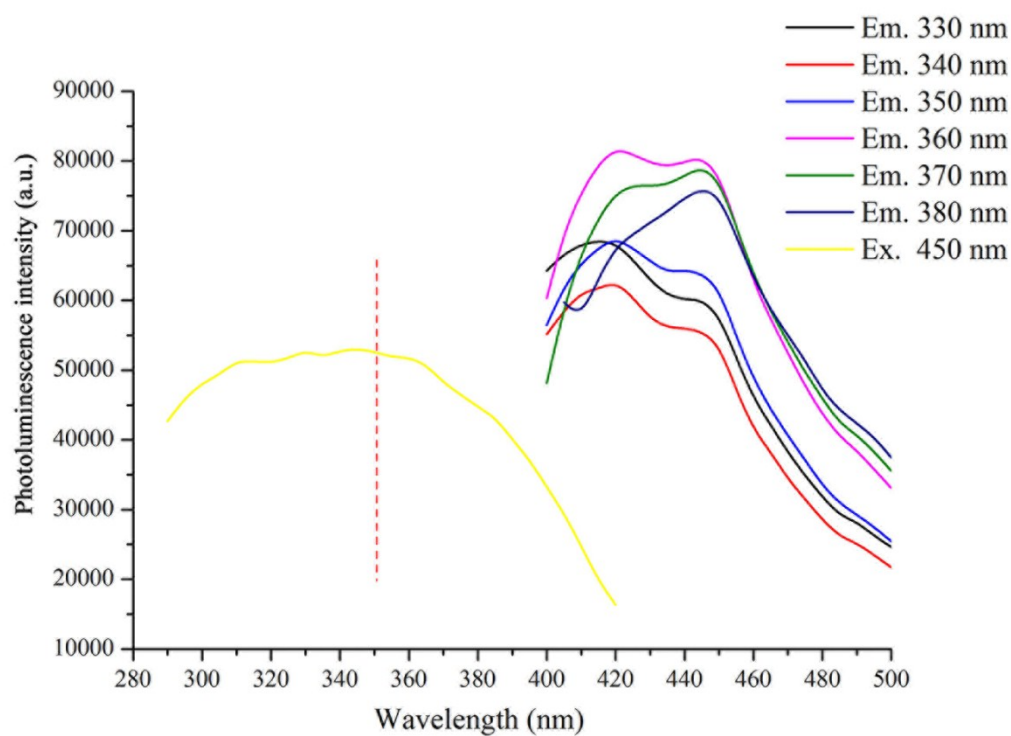

Fig. S4 The photoluminescence emission spectra of the VBimBF<sub>4</sub>B with the different excitations.

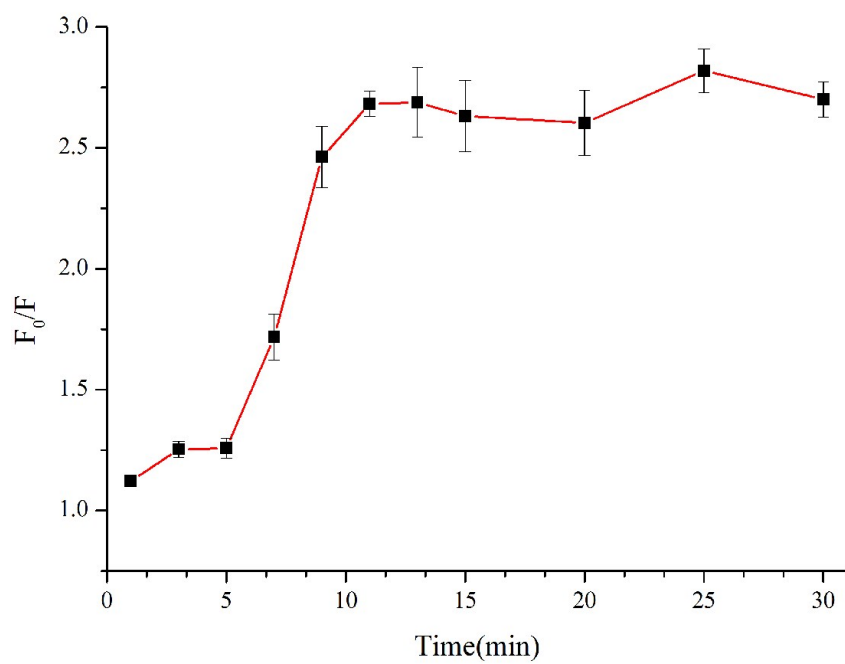

F

ig. S5 Adsorption time of CP (0.1 mg/L) on VBimBF<sub>4</sub>B-strengthened S-Cdots.

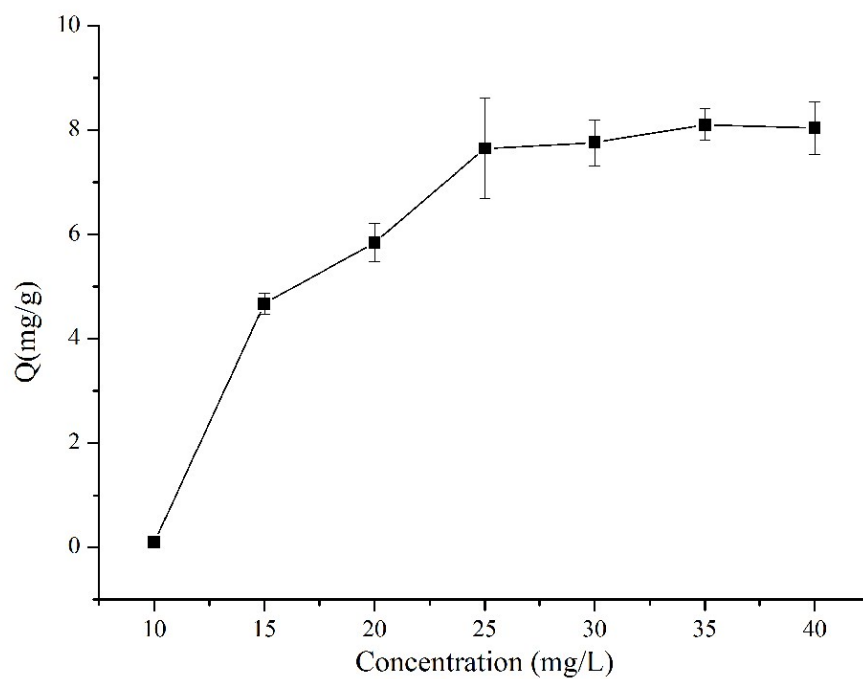

Fig. S6 Adsorption capacity of VBimBF<sub>4</sub>B-strengthened S-Cdots.

Table S1 Optimization of the molecular ratio of cartap and VBimBF<sub>4</sub>B/MAA.

| Cartap | VBimBF <sub>4</sub> B | MAA | EGDMA | $K_{SV}$      | $K^*_{SV}$    | $K_{SV}/K^*_{SV}$      |
|--------|-----------------------|-----|-------|---------------|---------------|------------------------|
| 1      | 2                     | 2   | 5     | 0.0065±0.0001 | 0.0056±0.0005 | 1.14±0.02 <sup>a</sup> |
| 1      | 3                     | 3   | 7.5   | 0.0112±0.0001 | 0.0056±0.0005 | 2.02±0.03 <sup>b</sup> |
| 1      | 4                     | 4   | 10    | 0.0145±0.0003 | 0.0056±0.0005 | 2.63±0.05 <sup>c</sup> |
| 1      | 5                     | 5   | 12.5  | 0.0154±0.0001 | 0.0056±0.0005 | 2.74±0.01 <sup>c</sup> |
| 1      | 6                     | 6   | 15    | 0.0154±0.0001 | 0.0056±0.0005 | 2.73±0.03 <sup>c</sup> |

$K_{SV}$  is the slope of the curve between the analyte concentrations and photoluminescence response in VBimBF<sub>4</sub>B-strengthened S-Cdots and  $K^*_{SV}$  is the slope of the curve between the analyte concentrations and photoluminescence response in the control groups.

Table S2 Optimization of the molecular ratio of EGDMA.

| Cartap | VBimBF <sub>4</sub> B | MAA | EGDMA | $K_{SV}$      | $K^*_{SV}$    | $K_{SV}/K^*_{SV}$      |
|--------|-----------------------|-----|-------|---------------|---------------|------------------------|
| 1      | 4                     | 4   | 5     | 0.0079±0.003  | 0.0053±0.0003 | 1.49±0.06 <sup>a</sup> |
| 1      | 4                     | 4   | 10    | 0.0145±0.0002 | 0.0056±0.0005 | 2.63±0.05 <sup>b</sup> |
| 1      | 4                     | 4   | 15    | 0.0085±0.0005 | 0.0054±0.0004 | 1.58±0.08 <sup>a</sup> |
| 1      | 4                     | 4   | 20    | 0.0068±0.0002 | 0.0049±0.001  | 1.38±0.04 <sup>c</sup> |

$K_{SV}$  is the slope of the curve between the analyte concentrations and photoluminescence response in VBimBF<sub>4</sub>B-strengthened S-Cdots and  $K^*_{SV}$  is the slope of the curve between the analyte concentrations and photoluminescence response in the control groups.

Table S3 Spiked recovery results for the determination of cartap in tap water.

| Actual concentration <sup>a</sup> | Detected concentration<br>(mean, n=3) | Recovery (%) |
|-----------------------------------|---------------------------------------|--------------|
| 10                                | 8.84                                  | 88.38±0.004  |
| 30                                | 23.25                                 | 77.48±0.053  |
| 50                                | 49.34                                 | 98.68±0.404  |
| 70                                | 58.60                                 | 83.71±0.034  |

<sup>a</sup> The concentration unit is µg/L
